# Supplementary material for: Genistein Targets STING-Driven Antiviral Responses
Source: PubMed Central journal article supplement (PMC9426420; doi:10.1128/mbio.02064-22), 2022-08-04
Supplement: mbio.02064-22-s0001.pdf [file mbio.02064-22-s0001.pdf]

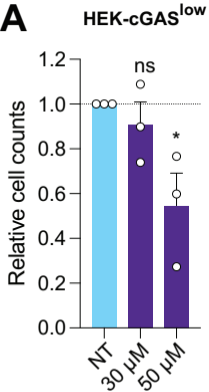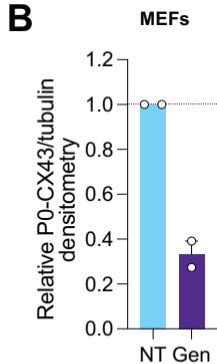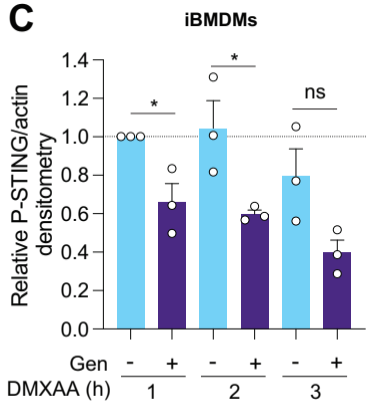

**Supplemental Figure S1**
