# Supplementary material for: Genistein Targets STING-Driven Antiviral Responses
Source: PubMed Central journal article supplement (PMC9426420; doi:10.1128/mbio.02064-22), 2022-08-04
Supplement: mbio.02064-22-s0003.pdf [file mbio.02064-22-s0003.pdf]

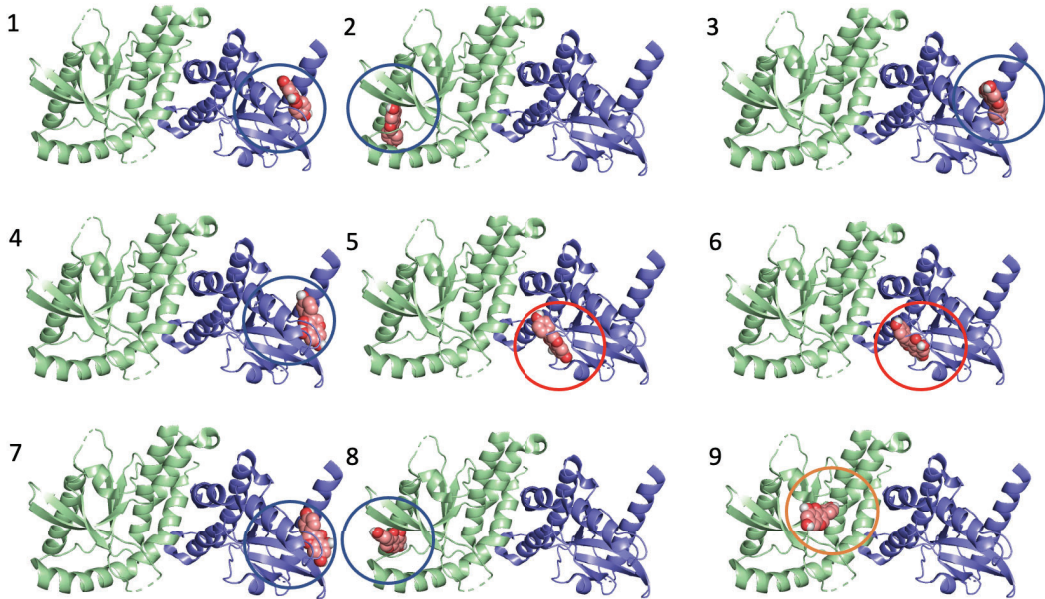

Energy score  
for each model  
(kcal/mol)

1. -7.5

2. -7.4

3. -7.3

4. -7.2

5. -7.2

6. -7.1

7. -7.0

8. -7.0

9. -7.0
